# Supplementary material for: Comprehensive analysis for genetic diagnosis of Dystrophinopathies in Japan
Source: Springer Nature journal article supplement (doi:10.1186/s13023-017-0703-4), 2017-08-31
Supplement: MOESM1 [file 14960390]

Table S1. Clinical and dystrophin immunostaining in the patients with a small mutation.

| Patient          | Phenotype | Age (y) | Ambulatory | Age(y) at not ambulatory | Dystrophin immunostaining | Exon | DNA change            | Protein (predicted) | Mutation function | Report     |
|------------------|-----------|---------|------------|--------------------------|---------------------------|------|-----------------------|---------------------|-------------------|------------|
| 1                | BMD       | 19      | Yes        |                          | faint&patchy              | int1 | c.31+1G>T             |                     | splicing          | reported   |
| 2                | BMD       | 6       | Yes        |                          | faint&patchy              | int1 | c.31+1G>T             |                     | splicing          | reported   |
| 3                | BMD       | 20      | Yes        |                          | faint&patchy              | int2 | c.94-9dupT            |                     | splicing          | unreported |
| 4                | BMD       | 17      | Yes        |                          | faint&patchy              | int2 | c.94-1G>T             |                     | splicing          | reported   |
| 5                | BMD       | 64      | No         | 56                       | faint&patchy              | 3    | c.152T>G              | p.Leu51Arg          | missense          | unreported |
| 6                | BMD       | 16      | Yes        |                          | faint&patchy              | 3    | c.157_158 delinsGA    | p.Leu53Asp          | small ins         | unreported |
| 7                | BMD       | 37      | No         | 24                       | faint&patchy              | 3    | c.160_162 delCTC      | p.Leu54del          | small del         | reported   |
| 8                | DMD       | 3       | Yes        |                          | not done                  | 4    | c.196A>T              | p.Lys66*            | nonsense          | unreported |
| 9                | BMD       | 22      | No         | 13                       | faint&patchy              | 4    | c.238 delG            | p.Ala80Hisfs*12     | small del         | unreported |
| 10               | BMD       | 10      | Yes        |                          | faint&patchy              | int4 | c.264+1G>T            |                     | splicing          | unreported |
| 11               | BMD       | 35      | Yes        |                          | negative                  | int4 | c.264+5G>A            |                     | splicing          | unreported |
| 12               | BMD       | 23      | Yes        |                          | faint&patchy              | int4 | c.265-463A>G          |                     | splicing          | unreported |
| 13               | DMD       | 8       | No         |                          | not done                  | 5    | c.312_313delTA        | p.His104Glnfs*33    | small del         | unreported |
| 14               | BMD       | 22      | Yes        |                          | negative                  | 5    | c.355C>T              | p.Gln119*           | nonsense          | reported   |
| 15               | DMD       | 9       | Yes        |                          | not done                  | 6    | c.418delC             | p.Leu140Serfs*2     | small del         | unreported |
| 16               | DMD       | 22      | No         | 13                       | negative                  | 6    | c.428G>A              | p.Trp143*           | nonsense          | unreported |
| 17               | DMD       | 5       | Yes        |                          | negative                  | 6    | c.433C>T              | p.Arg145*           | nonsense          | reported   |
| 18               | DMD       | 18      | No         | 8                        | negative                  | 6    | c.433C>T              | p.Arg145*           | nonsense          | reported   |
| 19               | BMD       | 32      | No         | 16                       | faint&patchy              | 6    | c.434G>C              | p.Avg145Pro         | missense          | reported   |
| 20 <sup>*1</sup> | DMD       | 9       | Yes        |                          | negative                  | 6    | c.436C>T              | p.Gln146*           | nonsense          | unreported |
| 21 <sup>*1</sup> | DMD       | 3       | No         |                          | not done                  | 6    | c.436C>T              | p.Gln146*           | nonsense          | unreported |
| 22 <sup>*2</sup> | BMD       | 33      | No         | 17                       | not done                  | 6    | c.481A>C              | p.Thr161Pro         | missense          | unreported |
| 23 <sup>*2</sup> | BMD       | 30      | No         | 18                       | faint&patchy              | 6    | c.481A>C              | p.Thr161Pro         | missense          | unreported |
| 24               | DMD       | 32      | No         | 8                        | not done                  | 6    | c.485_486dupGC        | p.Trp163Alafs*7     | small ins         | unreported |
| 25               | DMD       | 9       | Yes        |                          | negative                  | 6    | c.488G>A              | p.Trp163*           | nonsense          | reported   |
| 26               | DMD       | 12      | Yes        |                          | negative                  | 7    | c.583C>T              | p.Arg195*           | nonsense          | reported   |
| 27               | DMD       | 13      | No         | 9                        | negative                  | 7    | c.645delT             | p.Glu216Lysfs*14    | small del         | unreported |
| 28               | DMD       | 11      | Yes        |                          | negative                  | int7 | c.649+1G>A            |                     | splicing          | unreported |
| 29               | DMD       | 12      | Yes        |                          | negative                  | int7 | c.649+1 G>T           |                     | splicing          | reported   |
| 30               | DMD       | 13      | Yes        |                          | negative                  | 8    | c.701C>G              | p.Ser234*           | nonsense          | unreported |
| 31               | DMD       | 27      | No         | 11                       | negative                  | 8    | c.724C>T              | p.Gln242*           | nonsense          | reported   |
| 32               | DMD       | 27      | No         | 6                        | not done                  | 8    | c.724C>T              | p.Gln242*           | nonsense          | reported   |
| 33               | DMD       | 14      | Yes        |                          | not done                  | 8    | c.783dupT             | p.Lys262*           | small ins         | reported   |
| 34               | BMD       | 17      | Yes        |                          | negative                  | int8 | c.831+1G>A            |                     | splicing          | unreported |
| 35               | DMD       | 11      | Yes        |                          | not done                  | int8 | c.831+2T>C            |                     | splicing          | unreported |
| 36               | DMD       | 8       | Yes        |                          | negative                  | 9    | c.853G>T              | p.Gly285*           | nonsense          | unreported |
| 37               | DMD       | 16      | No         | 10                       | negative                  | 9    | c.857_858delAT        | p.Tyr286*           | small del         | unreported |
| 38               | BMD       | 27      | Yes        |                          | faint&patchy              | 9    | c.883C>T              | p.Arg295*           | nonsense          | reported   |
| 39               | DMD       | 12      | Yes        |                          | negative                  | 9    | c.899_903 CCTAC>TCTAG | p.Ala300_301Val*    | nonsense          | unreported |
| 40               | BMD       | 26      | No         | 15                       | faint&patchy              | int9 | c.961-1G>A            |                     | splicing          | reported   |
| 41               | DMD       | 8       | Yes        |                          | negative                  | 10   | c.966_967insT         | p.Glu323*           | small ins         | unreported |
| 42               | DMD       | 27      | No         | 11                       | negative                  | 10   | c.1061G>A             | p.Trp354*           | nonsense          | reported   |
| 43               | DMD       | 9       | Yes        |                          | negative                  | 10   | c.1093C>T             | p.Gln365*           | nonsense          | reported   |

|                  |     |    |     |    |          |       |                            |                  |           |            |
|------------------|-----|----|-----|----|----------|-------|----------------------------|------------------|-----------|------------|
| 44 <sup>*3</sup> | DMD | 15 | Yes |    | negative | 10    | c.1117G>T                  | p.Glu373*        | nonsense  | reported   |
| 45 <sup>*3</sup> | DMD | 15 | Yes |    | not done | 10    | c.1117G>T                  | p.Glu373*        | nonsense  | reported   |
| 46               | DMD | 4  | Yes |    | negative | int10 | c.1150-2A>T                |                  | splicing  | unreported |
| 47               | DMD | 7  | Yes |    | negative | 11    | c.1201del C                | p.Gln401fs*6     | small del | unreported |
| 48               | DMD | 18 | No  | 9  | negative | 11    | c.1205 dupT                | p.Leu402Phefs*4  | small ins | unreported |
| 49               | DMD | 26 | No  | 9  | negative | 11    | c.1247_1248<br>insAGAAATGA | p.Thr418Metfs*10 | small ins | unreported |
| 50               | DMD | 16 | Yes |    | not done | 11    | c.1323_1324delinsG         | p.Gln442Lysfs*8  | small ins | unreported |
| 51               | DMD | 7  | Yes |    | not done | 12    | c.1336_1337 del CA         | p.His446*        | small del | unreported |
| 52               | DMD | 8  | Yes |    | negative | 12    | c.1339A>T                  | p.Arg447*        | nonsense  | unreported |
| 53               | DMD | 13 | Yes |    | negative | 12    | c.1357C>T                  | p.Gln453*        | nonsense  | reported   |
| 54               | DMD | 6  | Yes |    | negative | 12    | c.1365_1366delGA           | p.Lys456Thrfs*6  | small del | unreported |
| 55               | DMD | 7  | Yes |    | negative | 12    | c.1372A>T                  | p.Lys458*        | nonsense  | unreported |
| 56               | DMD | 5  | Yes |    | negative | 12    | c.1388G>A                  | p.Trp463*        | nonsense  | reported   |
| 57               | DMD | 5  | Yes |    | negative | 12    | c.1394delC                 | p.Thy465Lysfs*22 | small del | reported   |
| 58               | DMD | 22 | No  | 9  | negative | 12    | c.1429G>T                  | p.Gln477*        | nonsense  | reported   |
| 59               | DMD | 22 | No  | 9  | not done | 12    | c.1481_1482delAG           | p.Lys494Serfs*24 | small del | unreported |
| 60               | DMD | 12 | Yes |    | negative | 13    | c.1498delC                 | p.Leu500*        | small del | unreported |
| 61               | DMD | 20 | No  | 12 | negative | 13    | c.1504C>T                  | p.Gln502*        | nonsense  | unreported |
| 62               | IMD | 12 | Yes |    | negative | 13    | c.1603-15_1639dup52        | p.Thr547Ilefs*16 | small ins | unreported |
| 63               | DMD | 9  | Yes |    | negative | 14    | c.1615C>T                  | p.Arg539*        | nonsense  | reported   |
| 64               | DMD | 3  | Yes |    | negative | 14    | c.1615C>T                  | p.Arg539*        | nonsense  | reported   |
| 65               | DMD | 15 | Yes |    | not done | 14    | c.1627delA                 | p.Ile543Serfs*40 | small del | reported   |
| 66               | DMD | 14 | Yes |    | unknown  | 14    | c.1652G>A                  | p.Trp551*        | nonsense  | unreported |
| 67               | DMD | 20 | No  | 9  | negative | 14    | c.1663C>T                  | p.Gln555*        | nonsense  | reported   |
| 68               | DMD | 6  | Yes |    | negative | 14    | c.1663C>T                  | p.Gln555*        | nonsense  | reported   |
| 69               | DMD | 5  | Yes |    | negative | 14    | c.1663C>T                  | p.Gln555*        | nonsense  | reported   |
| 70               | DMD | 21 | No  | 11 | not done | 14    | c.1684C>T                  | p.Gln562*        | nonsense  | reported   |
| 71               | DMD | 6  | Yes |    | not done | 15    | c.1707C>A                  | p.Cys569*        | nonsense  | reported   |
| 72               | DMD | 31 | No  | 6  | negative | 15    | c.1713delT                 | p.Phe571Leufs*12 | small del | unreported |
| 73               | DMD | 16 | No  | 8  | negative | 15    | c.1732A>T                  | p.Lys578*        | nonsense  | reported   |
| 74               | DMD | 19 | No  | 10 | negative | 16    | c.1952_1953delinsC         | p.Trp651Serfs*4  | small ins | unreported |
| 75               | DMD | 16 | No  | 8  | negative | 16    | c.1966C>T                  | p.Gln656*        | nonsense  | reported   |
| 76               | DMD | 12 | Yes |    | negative | 17    | c.2017C>T                  | p.Gln673*        | nonsense  | reported   |
| 77               | DMD | 41 | No  | 9  | not done | 17    | c.2032C>T                  | p.Gln678*        | nonsense  | reported   |
| 78               | DMD | 27 | No  | 9  | negative | 17    | c.2047G>T                  | p.Glu683*        | nonsense  | reported   |
| 79               | DMD | 21 | No  | 9  | negative | 17    | c.2061_2067del<br>GGTGACC  | p.Val688Glnfs*7  | small del | unreported |
| 80               | DMD | 12 | Yes |    | negative | 17    | c.2069_2070delCA           | p.Thr690Lysfs*29 | small del | unreported |
| 81               | DMD | 15 | No  | 7  | negative | 17    | c.2077C>T                  | p.Gln 693*       | nonsense  | reported   |
| 82               | DMD | 8  | Yes |    | negative | 17    | c.2077C>T                  | p.Gln 693*       | nonsense  | reported   |
| 83               | DMD | 29 | No  | 12 | negative | int17 | c.2169-1G>A                |                  | splicing  | unreported |
| 84               | DMD | 13 | Yes |    | not done | 18    | c.2230_2231delAG           | p.Pro745*        | small del | reported   |
| 85 <sup>*4</sup> | DMD | 11 | Yes |    | negative | 18    | c.2270C>G                  | p.Ser757*        | nonsense  | reported   |
| 86 <sup>*4</sup> | DMD | 8  | Yes |    | not done | 18    | c.2270C>G                  | p.Ser 757*       | nonsense  | reported   |
| 87               | DMD | 7  | Yes |    | negative | 18    | c.2281_2285delGAAAA        | p.Glu761Serfs*10 | small del | unreported |
| 88               | DMD | 12 | Yes |    | negative | 19    | c.2302C>T                  | p.Arg768*        | nonsense  | reported   |
| 89               | DMD | 12 | Yes |    | negative | 19    | c.2302C>T                  | p.Arg768*        | nonsense  | reported   |

|     |     |    |     |    |              |       |                        |                   |           |            |
|-----|-----|----|-----|----|--------------|-------|------------------------|-------------------|-----------|------------|
| 90  | DMD | 4  | Yes |    | negative     | 19    | c.2353C>T              | p.Gln785*         | nonsense  | reported   |
| 91  | DMD | 43 | No  |    | not done     | 19    | c.2365G>T              | p.Glu789*         | nonsense  | reported   |
| 92  | DMD | 8  | Yes |    | negative     | 20    | c.2400delC             | p.Ser800Argfs*9   | small del | unreported |
| 93  | DMD | 11 | Yes |    | not done     | 20    | c.2430_2443del14       | p.Arg811Leufs*6   | small del | reported   |
| 94  | DMD | 21 | No  | 10 | negative     | 20    | c.2435G>A              | p.Trp812*         | nonsense  | reported   |
| 95  | DMD | 20 | No  | 11 | unknown      | 20    | c.2448C>A              | p.Cys816*         | nonsense  | unreported |
| 96  | DMD | 19 | No  | 11 | not done     | 20    | c.2448C>A              | p.Cys816*         | nonsense  | unreported |
| 97  | DMD | 21 | No  | 9  | negative     | 20    | c.2584G>T              | p.Glu862*         | nonsense  | unreported |
| 98  | DMD | 6  | No  |    | not done     | 20    | c.2591delC             | p.Thr864Lysfs*7   | small del | reported   |
| 99  | DMD | 13 | Yes |    | negative     | int20 | c.2622+1G>A            |                   | splicing  | reported   |
| 100 | DMD | 31 | No  | 10 | unknown      | 21    | c.2665C>T              | p.Arg889*         | nonsense  | reported   |
| 101 | DMD | 7  | Yes |    | faint&patchy | 21    | c.2673_2674 del AAinsG | p.Ile892Phefs*4   | small ins | unreported |
| 102 | DMD | 8  | Yes |    | negative     | 21    | c.2674delA             | p.Ile892Phefs*4   | small del | reported   |
| 103 | BMD | 19 | Yes |    | negative     | 21    | c.2704C>T              | p.Gln902*         | nonsense  | reported   |
| 104 | DMD | 13 | Yes |    | negative     | 21    | c.2758C>T              | p.Gln920*         | nonsense  | reported   |
| 105 | DMD | 20 | No  | 12 | unknown      | 21    | c.2758C>T              | p.Gln920*         | nonsense  | reported   |
| 106 | DMD | 17 | No  | 9  | negative     | 21    | c.2758C>T              | p.Gln920*         | nonsense  | reported   |
| 107 | DMD | 28 | No  | 13 | negative     | 21    | c.2788A>T              | p.Lys930*         | nonsense  | reported   |
| 108 | DMD | 17 | No  | 8  | negative     | 21    | c.2797C>T              | p.Gln933*         | nonsense  | reported   |
| 109 | DMD | 19 | No  | 11 | negative     | int21 | c.2804-1G>T            |                   | splicing  | unreported |
| 110 | DMD | 14 | Yes |    | not done     | int21 | c.2804-2 A>G           |                   | splicing  | reported   |
| 111 | DMD | 10 | Yes |    | unknown      | 22    | c.2808dupT             | c.Asp937*         | small ins | reported   |
| 112 | DMD | 7  | Yes |    | negative     | 22    | c.2949G>T              | p.Gln9832His      | missense  | unreported |
| 113 | DMD | 25 | No  | 12 | negative     | 23    | c.2968C>T              | p.Gln990*         | nonsense  | reported   |
| 114 | DMD | 16 | Yes |    | negative     | 23    | c.3013G>T              | p.Glu1005*        | nonsense  | unreported |
| 115 | DMD | 13 | Yes |    | negative     | 23    | c.3079 G>T             | p.Gly1027*        | nonsense  | unreported |
| 116 | DMD | 16 | No  | 12 | negative     | 23    | c.3086G>A              | p.Trp1029*        | nonsense  | reported   |
| 117 | DMD | 12 | Yes |    | negative     | 23    | c.3121C>T              | p.Gln1041*        | nonsense  | reported   |
| 118 | DMD | 14 | No  | 9  | negative     | 23    | c.3136C>T              | p.Gln1046*        | nonsense  | reported   |
| 119 | DMD | 5  | Yes |    | negative     | 23    | c.3151C>T              | p.Arg1051*        | nonsense  | reported   |
| 120 | DMD | 19 | No  | 10 | negative     | 23    | c.3151C>T              | p.Arg1051*        | nonsense  | reported   |
| 121 | DMD | 23 | No  | 11 | negative     | 24    | c.3183delG             | p.Lys1062Asnfs*10 | small del | unreported |
| 122 | DMD | 3  | Yes |    | negative     | 24    | c.3188_3200del         | p.Trp1063Leufs*5  | small del | unreported |
| 123 | DMD | 14 | Yes |    | negative     | 24    | c.3257dupA             | p.Gln1087Alafs*11 | small ins | reported   |
| 124 | IMD | 19 | Yes |    | faint&patchy | 25    | c.3295C>T              | p.Gln1099*        | nonsense  | reported   |
| 125 | BMD | 8  | Yes |    | faint&patchy | 25    | c.3304C>T              | p.Gln1102*        | nonsense  | reported   |
| 126 | BMD | 31 | Yes |    | faint&patchy | 25    | c.3337C>T              | p.Gln1113*        | nonsense  | reported   |
| 127 | DMD | 24 | No  | 9  | negative     | 25    | c.3408_3409delinsGT    | p.Gln1137*        | small ins | unreported |
| 128 | BMD | 56 | No  | 54 | faint&patchy | 25    | c.3430C>T              | p.Gln1144*        | nonsense  | reported   |
| 129 | DMD | 15 | Yes |    | negative     | 26    | c.3448G>T              | p.Glu1150*        | nonsense  | unreported |
| 130 | DMD | 15 | Yes |    | negative     | 26    | c.3500C>G              | p.Ser1167*        | nonsense  | reported   |
| 131 | DMD | 22 | No  | 9  | negative     | 26    | c.3530_3538 dup        | p.Tyr1180*        | small ins | unreported |
| 132 | DMD | 19 | No  | 9  | not done     | 26    | c.3562A>T              | p.Lys1188*        | nonsense  | reported   |
| 133 | DMD | 15 | Yes |    | negative     | 26    | c.3565insA             | p.Thr1189Asnfs*4  | small ins | unreported |
| 134 | DMD | 9  | Yes |    | negative     | int26 | c.3603+1G>T            |                   | splicing  | reported   |
| 135 | BMD | 32 | Yes |    | faint&patchy | int26 | c.3603+3A>T            |                   | splicing  | reported   |
| 136 | BMD | 19 | Yes |    | faint&patchy | int26 | c.3603+3A>T            |                   | splicing  | reported   |

|                   |     |    |     |    |              |       |                             |                      |           |            |
|-------------------|-----|----|-----|----|--------------|-------|-----------------------------|----------------------|-----------|------------|
| 137               | BMD | 23 | Yes |    | faint&patchy | int26 | c.3603+3A>T                 |                      | splicing  | reported   |
| 138               | BMD | 22 | Yes |    | faint&patchy | int26 | c.3603+3A>T                 |                      | splicing  | reported   |
| 139               | DMD | 9  | Yes |    | faint&patchy | 27    | c.3613G>T                   | p.Glu1205*           | nonsense  | unreported |
| 140               | DMD | 8  | Yes |    | not done     | 27    | c.3661_3662del              | p.Val1221Lysfs*2     | small del | unreported |
| 141               | DMD | 9  | Yes |    | negative     | 27    | c.3734_3743<br>delACTACCA   | p.Asn1246Serfs*7     | small del | unreported |
| 142               | DMD | 23 | No  | 11 | negative     | 27    | c.3765dupT                  | p.Gly1256Trpfs*15    | small ins | reported   |
| 143               | DMD | 29 | No  | 10 | unknown      | int27 | c.3786+1G>A                 |                      | splicing  | reported   |
| 144               | BMD | 44 | Yes |    | faint&patchy | 28    | c.3909dupT                  | p.Glu1304*           | small ins | reported   |
| 145               | BMD | 6  | Yes |    | not done     | 29    | c.3940C>T                   | p.Arg1314*           | nonsense  | reported   |
| 146               | DMD | 7  | Yes |    | negative     | 29    | c.4066G>T                   | p.Glu1356*           | nonsense  | unreported |
| 147               | DMD | 4  | Yes |    | not done     | 29    | c.4066G>T                   | p.Glu1356*           | nonsense  | unreported |
| 148               | BMD | 11 | Yes |    | faint&patchy | int29 | c.4071+2T>C                 |                      | splicing  | unreported |
| 149               | BMD | 41 | No  | 35 | faint&patchy | 30    | c.4071_4079<br>delGGCTGTAAG | p.Ala1358_Arg1360del | small del | unreported |
| 150 <sup>*5</sup> | DMD | 19 | No  | 11 | negative     | 30    | c.4087_4088 delAA           | p.Lys1363Valfs*3     | small del | unreported |
| 151 <sup>*5</sup> | DMD | 16 | No  | 11 | not done     | 30    | c.4087_4088 delAA           | p.Lys1363Valfs*3     | small del | unreported |
| 152 <sup>*6</sup> | DMD | 20 | No  | 10 | negative     | 30    | c.4126G>T                   | p.Glu1376*           | nonsense  | unreported |
| 153 <sup>*6</sup> | DMD | 17 | No  | 10 | not done     | 30    | c.4126G>T                   | p.Glu1376*           | nonsense  | unreported |
| 154               | DMD | 33 | No  | 10 | negative     | 30    | c.4160delC                  | p.Thr1387Asnfs*31    | small del | unreported |
| 155               | BMD | 14 | Yes |    | faint&patchy | 31    | c.4294C>T                   | p.Gln1432*           | nonsense  | unreported |
| 156               | BMD | 38 | Yes |    | faint&patchy | 31    | c.4327C>T                   | p.Gln1443*           | nonsense  | unreported |
| 157               | DMD | 10 | Yes |    | not done     | 32    | c.4375C>T                   | p.Arg1459*           | nonsense  | reported   |
| 158               | DMD | 17 | No  | 8  | negative     | 32    | c.4384C>T                   | p.Gln1462*           | nonsense  | reported   |
| 159               | DMD | 8  | Yes |    | negative     | 32    | c.4495C>T                   | p.Gln1499*           | nonsense  | reported   |
| 160               | DMD | 14 | Yes |    | negative     | 32    | c.4501C>T                   | p.Gln1501*           | nonsense  | unreported |
| 161               | DMD | 17 | No  | 9  | faint&patchy | int32 | c.4518+1G>T                 |                      | splicing  | unreported |
| 162               | DMD | 20 | No  | 8  | not done     | int32 | c.4518+2T>C                 |                      | splicing  | unreported |
| 163               | DMD | 25 | No  | 11 | negative     | int32 | c.4518+5G>A                 |                      | splicing  | reported   |
| 164               | DMD | 14 | Yes |    | negative     | 33    | c.4535_4536delTG            | p.Leu1512Glnfs*2     | small del | unreported |
| 165               | DMD | 18 | No  | 12 | negative     | 33    | c.4537_4541delAGTGA         | p.Lys1516*           | small del | unreported |
| 166               | DMD | 3  | Yes |    | negative     | 33    | c.4540G>T                   | p.Glu1514*           | nonsense  | unreported |
| 167               | DMD | 25 | No  | 11 | negative     | 33    | c.4545_4549delGAAGT         | p.Lys1516*           | small del | unreported |
| 168 <sup>*7</sup> | DMD | 10 | Yes |    | not done     | 33    | c.4600C>T                   | p.Gln1534*           | nonsense  | reported   |
| 169 <sup>*7</sup> | DMD | 11 | Yes |    | negative     | 33    | c.4600C>T                   | p.Gln1534*           | nonsense  | reported   |
| 170 <sup>*8</sup> | DMD | 13 | Yes |    | negative     | 34    | c.4724delA                  | p.Lys1575Argfs*6     | small del | unreported |
| 171 <sup>*8</sup> | DMD | 11 | No  | 7  | not done     | 34    | c.4724delA                  | p.Lys1575Argfs*6     | small del | unreported |
| 172               | DMD | 25 | No  | 11 | negative     | 34    | c.4729C>T                   | p.Arg1577*           | nonsense  | reported   |
| 173               | DMD | 14 | No  | 6  | unknown      | 35    | c.4870 C>T                  | p.Gln1624*           | nonsense  | reported   |
| 174               | DMD | 35 | No  | 10 | not done     | 35    | c.4996C>T                   | p.Arg1666*           | nonsense  | reported   |
| 175               | DMD | 28 | No  | 7  | unknown      | 35    | c.5000_5001dupCA            | p.Glu1668Glnfs*5     | small ins | unreported |
| 176               | DMD | 20 | No  | 10 | negative     | 36    | c.5044G>T                   | p.Glu1682*           | nonsense  | reported   |
| 177               | DMD | 19 | No  | 9  | unknown      | 36    | c.5052delT                  | p.Phe1684Leufs*37    | small del | unreported |
| 178               | DMD | 11 | Yes |    | negative     | 36    | c.5082G>A                   | p.Try1694*           | nonsense  | unreported |
| 179               | DMD | 8  | Yes |    | negative     | 36    | c.5101delC                  | p.Leu1701Phefs*20    | small del | unreported |
| 180               | DMD | 15 | No  | 10 | negative     | 36    | c.5131delC                  | p.Gln1711Serfs*10    | small del | unreported |
| 181               | DMD | 20 | No  | 12 | not done     | 36    | c.5140delG                  | p.Glu1714Lysfs*7     | small del | reported   |
| 182               | IMD | 49 | No  | 13 | not done     | 36    | c.5140delG                  | p.Glu1714Lysfs*7     | small del | reported   |

|                    |     |    |     |    |              |       |                    |                   |           |            |
|--------------------|-----|----|-----|----|--------------|-------|--------------------|-------------------|-----------|------------|
| 183                | DMD | 14 | Yes |    | negative     | 37    | c.5285delA         | p.His1762Leufs*19 | small del | unreported |
| 184                | DMD | 22 | No  | 11 | negative     | 37    | c.5285delA         | p.His1762Leufs*19 | small del | unreported |
| 185                | BMD | 58 | No  | 41 | faint&patchy | 38    | c.5287C>T          | p.Arg1763*        | nonsense  | reported   |
| 186                | DMD | 27 | No  | 11 | unknown      | 38    | c.5350G>T          | p.Glu1784*        | nonsense  | reported   |
| 187                | DMD | 16 | Yes |    | negative     | 38    | c.5364dupA         | p.Asp1789Argfs*7  | small ins | unreported |
| 188                | BMD | 23 | Yes |    | faint&patchy | 38    | c.5371C>T          | p.Gln1791*        | nonsense  | reported   |
| 189                | BMD | 12 | Yes |    | faint&patchy | 38    | c.5407C>T          | p.Gln1803*        | nonsense  | reported   |
| 190                | DMD | 5  | Yes |    | negative     | 38    | c.5413dupG         | p.Val1805Glyfs*10 | small ins | reported   |
| 191                | DMD | 11 | Yes |    | negative     | int38 | c.5449-3 C>G       |                   | splicing  | unreported |
| 192                | DMD | 7  | Yes |    | negative     | 39    | c.5451_5454delTGAA | p.Asn1817Lysfs*7  | small del | unreported |
| 193                | DMD | 6  | Yes |    | negative     | 39    | c.5487_5488delAA   | p.Gly1831Argfs*10 | small del | reported   |
| 194                | DMD | 9  | Yes |    | negative     | 39    | c.5503C>T          | p.Gln1835*        | nonsense  | unreported |
| 195                | DMD | 6  | Yes |    | negative     | 39    | c.5530 C>T         | p.Arg1844*        | nonsense  | reported   |
| 196                | DMD | 7  | Yes |    | negative     | 39    | c.5530C>T          | p.Arg1844*        | nonsense  | reported   |
| 197 <sup>*9</sup>  | DMD | 13 | Yes |    | negative     | 39    | c.5530C>T          | p.Arg1844*        | nonsense  | reported   |
| 198 <sup>*9</sup>  | DMD | 9  | Yes |    | not done     | 39    | c.5530C>T          | p.Arg1844*        | nonsense  | reported   |
| 199                | DMD | 10 | Yes |    | negative     | 39    | c.5551C>T          | p.Gln1851*        | nonsense  | reported   |
| 200                | DMD | 17 | No  | 12 | negative     | 39    | c.5551C>T          | p.Gln1851*        | nonsense  | reported   |
| 201                | DMD | 5  | Yes |    | negative     | 39    | c.5563C>T          | p.Gln1855*        | nonsense  | reported   |
| 202                | DMD | 10 | Yes |    | negative     | 40    | c.5599C>T          | p.Gln1867*        | nonsense  | unreported |
| 203                | DMD | 14 | Yes |    | negative     | 40    | c.5602A>T          | p.Arg1868*        | nonsense  | unreported |
| 204                | DMD | 20 | No  | 10 | negative     | 40    | c.5602_5605delAGAA | p.Arg1868Glnfs*5  | small del | reported   |
| 205                | DMD | 13 | Yes |    | negative     | 40    | c.5602_5605delAGAA | p.Arg1868Glnfs*5  | small del | reported   |
| 206                | DMD | 7  | Yes |    | negative     | 40    | c.5641C>T          | p.Gln1881*        | nonsense  | reported   |
| 207                | DMD | 13 | No  | 9  | negative     | 40    | c.5697dupA         | p.Leu1900Ilefs*6  | small ins | reported   |
| 208                | DMD | 7  | Yes |    | negative     | 41    | c.5758C>T          | p.Gln1920*        | nonsense  | reported   |
| 209                | DMD | 9  | Yes |    | negative     | 41    | c.5770G>T          | p.Glu1924*        | nonsense  | unreported |
| 210                | DMD | 16 | No  | 10 | faint&patchy | 41    | c.5899C>T          | p.Arg1967*        | nonsense  | reported   |
| 211                | DMD | 12 | Yes |    | unknown      | 41    | c.5899C>T          | p.Arg1967*        | nonsense  | reported   |
| 212                | IMD | 12 | Yes |    | faint&patchy | 41    | c.5899C>T          | p.Arg1967*        | nonsense  | reported   |
| 213                | DMD | 17 | Yes |    | negative     | 42    | c.5985T>G          | p.Tyr1995*        | nonsense  | reported   |
| 214                | DMD | 13 | Yes |    | negative     | 42    | c.6076_6077dupAA   | p.Asp2027Argfs*13 | small ins | unreported |
| 215                | BMD | 16 | Yes |    | faint&patchy | int42 | c.6118-15A>G       |                   | splicing  | unreported |
| 216                | DMD | 29 | No  | 10 | not done     | 43    | c.6136C>T          | p.Gln2046*        | nonsense  | unreported |
| 217                | DMD | 29 | No  | 13 | negative     | 43    | c.6272delT         | p.Met2091Serfs*23 | small del | reported   |
| 218                | DMD | 16 | Yes |    | negative     | 43    | c.6283C>T          | p.Arg2095*        | nonsense  | reported   |
| 219                | DMD | 26 | No  | 9  | negative     | 43    | c.6283C>T          | p.Arg2095*        | nonsense  | reported   |
| 220                | DMD | 7  | Yes |    | negative     | 43    | c.6283C>T          | p.Arg2095*        | nonsense  | reported   |
| 221                | DMD | 24 | No  | 11 | negative     | int43 | c.6290+1G>T        |                   | splicing  | unreported |
| 222                | BMD | 24 | No  | 18 | faint&patchy | int43 | c.6290+5G>C        |                   | splicing  | unreported |
| 223                | DMD | 23 | No  | 10 | negative     | int43 | c.6290+5G>C        |                   | splicing  | unreported |
| 224                | DMD | 17 | Yes |    | not done     | int43 | c.6291-1G>A        |                   | splicing  | reported   |
| 225                | DMD | 8  | Yes |    | negative     | 44    | c.6292C>T          | p.Arg2098*        | nonsense  | reported   |
| 226 <sup>*10</sup> | DMD | 12 | Yes |    | negative     | 44    | c.6337delA         | p.Ile2113*        | small del | reported   |
| 227 <sup>*10</sup> | DMD | 10 | Yes |    | not done     | 44    | c.6337delA         | p.Ile2113*        | small del | reported   |
| 228                | DMD | 17 | No  | 11 | negative     | 44    | c.6356G>A          | p.Trp2119*        | nonsense  | unreported |
| 229                | DMD | 16 | Yes |    | not done     | 44    | c.6430dupT         | p.Tyr2144Leufs*3  | small ins | reported   |

|                    |     |    |     |    |              |       |                      |                   |           |            |
|--------------------|-----|----|-----|----|--------------|-------|----------------------|-------------------|-----------|------------|
| 230                | DMD | 31 | No  | 10 | not done     | 44    | c.6432T>A            | p.Tyr3144*        | nonsense  | reported   |
| 231                | DMD | 15 | Yes |    | negative     | 45    | c.6611dupA           | p.Arg2205Glufs*18 | small ins | reported   |
| 232                | IMD | 22 | No  | 12 | faint&patchy | int45 | c.6614+2T>C          |                   | splicing  | reported   |
| 233                | DMD | 20 | No  | 7  | not done     | int45 | c.6615-2A>T          |                   | splicing  | reported   |
| 234                | DMD | 13 | No  | 8  | negative     | 46    | c.6643delG           | p.Glu2215Asnfs*6  | small del | unreported |
| 235                | DMD | 25 | No  | 11 | negative     | 46    | c.6659T>G            | p.Leu2220*        | nonsense  | unreported |
| 236                | DMD | 14 | Yes |    | unknown      | 46    | c.6751_6754delGAGC   | p.Glu2252Lysfs*19 | small del | unreported |
| 237                | DMD | 12 | Yes |    | negative     | 46    | c.6754dupC           | p.Gln2252Profs*21 | small ins | unreported |
| 238                | DMD | 19 | No  | 10 | not done     | 47    | c.6804_6807delACAA   | p.Lys2268Asnfs*2  | small del | reported   |
| 239                | DMD | 5  | Yes |    | negative     | 48    | c.6913C>T            | p.Gln2325*        | nonsense  | unreported |
| 240                | DMD | 30 | No  | 12 | negative     | 48    | c.6923_6933del11     | p.Ala2308Glufs*6  | small del | reported   |
| 241                | DMD | 20 | No  | 11 | not done     | 48    | c.6949G>T            | p.Glu2317*        | nonsense  | unreported |
| 242                | DMD | 5  | Yes |    | negative     | 48    | c.6973C>T            | p.Gln2325*        | nonsense  | reported   |
| 243                | DMD | 9  | Yes |    | negative     | 48    | c.6980delA           | p.Lys2329Serfs*9  | small del | unreported |
| 244                | DMD | 25 | No  | 7  | negative     | 48    | c.6986delA           | p.Lys2329Serfs*9  | small del | unreported |
| 245                | DMD | 24 | No  | 11 | not done     | 48    | c.7060delT           | p.Tyr2354Ilefs*17 | small del | unreported |
| 246                | DMD | 10 | Yes |    | negative     | 49    | c.7126C>T            | p.Gln 2376*       | nonsense  | unreported |
| 247                | IMD | 37 | No  | 13 | faint&patchy | int50 | c.7310-1G>A          |                   | splicing  | reported   |
| 248                | DMD | 18 | No  | 8  | not done     | int51 | c.7543-5_7641del     |                   | splicing  | unreported |
| 249                | DMD | 24 | No  | 12 | not done     | 52    | c.7565delA           | p.Gln2522Argfs*15 | small del | unreported |
| 250                | DMD | 27 | No  | 11 | negative     | 52    | c.7657C>T            | p.Arg2553*        | nonsense  | reported   |
| 251                | DMD | 17 | Yes |    | not done     | 52    | c.7657C>T            | p.Arg2553*        | nonsense  | reported   |
| 252                | DMD | 8  | Yes |    | negative     | int52 | c.7661-11T>C         |                   | splicing  | unreported |
| 253                | DMD | 16 | Yes |    | negative     | 53    | c.7665_7666 ins GA   | p.Arg2556Glufs*21 | small ins | unreported |
| 254                | DMD | 15 | Yes |    | negative     | 53    | c.7686_7702del17insA | p.Asp2562Glufs*9  | small ins | unreported |
| 255                | DMD | 6  | Yes |    | negative     | 53    | c.7693C>T            | p.Gln2565*        | nonsense  | reported   |
| 256                | DMD | 25 | No  | 8  | negative     | 53    | c.7714delA           | p.Arg2572Glyfs*4  | small del | unreported |
| 257                | DMD | 24 | No  | 10 | unknown      | 53    | c.7750C>T            | p.Gln2584X*       | nonsense  | unreported |
| 258                | DMD | 9  | Yes |    | not done     | 53    | c.7787delT           | p.Leu2596*        | small del | unreported |
| 259                | DMD | 14 | Yes |    | negative     | 53    | c.7833dupT           | p.Thr2612Tyrfs*31 | small ins | unreported |
| 260                | DMD | 23 | No  | 10 | negative     | 54    | c.7873C>T            | p.Gln2625*        | nonsense  | unreported |
| 261                | DMD | 16 | No  | 9  | negative     | 54    | c.7891dupC           | p.Arg2631Profs*12 | small ins | unreported |
| 262 <sup>*11</sup> | DMD | 10 | Yes |    | negative     | 54    | c.7894C>T            | p.Gln2632*        | nonsense  | unreported |
| 263 <sup>*11</sup> | DMD | 13 | Yes |    | negative     | 54    | c.7894C>T            | p.Gln2632*        | nonsense  | unreported |
| 264                | BMD | 13 | Yes |    | faint&patchy | 54    | c.8009G>A            | p.Trp 2670*       | nonsense  | reported   |
| 265                | DMD | 35 | No  | 9  | unknown      | 54    | c.8010G>A            | p.Trp2670*        | nonsense  | unreported |
| 266                | DMD | 14 | Yes |    | negative     | int54 | c.8027+11C>T         |                   | splicing  | unreported |
| 267 <sup>*12</sup> | DMD | 15 | No  | 8  | not done     | 55    | c.8053G>T            | p.Glu2685*        | nonsense  | unreported |
| 268 <sup>*12</sup> | DMD | 18 | No  | 10 | negative     | 55    | c.8053G>T            | p.Glu2685*        | nonsense  | unreported |
| 269                | DMD | 6  | Yes |    | not done     | 55    | c.8159delG           | p.Arg2720Leufs*6  | small del | unreported |
| 270                | DMD | 13 | Yes |    | negative     | 55    | c.8171_8172insT      | p.Leu2725Profs*20 | small ins | unreported |
| 271                | DMD | 15 | Yes |    | negative     | 55    | c.8209_8210 dup CA   | p.Gln2737Hisfs*28 | small ins | unreported |
| 272                | DMD | 6  | Yes |    | negative     | 55    | c.8214G>A            | p.Trp2738*        | nonsense  | reported   |
| 273                | DMD | 28 | No  | 10 | negative     | int55 | c.8217+5G>A          |                   | splicing  | unreported |
| 274                | DMD | 17 | No  | 12 | negative     | int55 | c.8218-2A>G          |                   | splicing  | reported   |
| 275                | DMD | 10 | Yes |    | negative     | 56    | c.8299G>T            | p.Glu2767*        | nonsense  | unreported |
| 276                | DMD | 19 | No  | 11 | negative     | int56 | c.8391-1G>A          |                   | splicing  | unreported |

|                    |     |    |     |    |              |       |                                 |                   |           |            |
|--------------------|-----|----|-----|----|--------------|-------|---------------------------------|-------------------|-----------|------------|
| 277                | DMD | 18 | No  | 11 | negative     | 57    | c.8416C>T                       | p.Gln2806*        | nonsense  | reported   |
| 278                | DMD | 16 | Yes |    | negative     | 57    | c.8438delC                      | p.Ser2813Phefs*11 | small del | unreported |
| 279                | DMD | 14 | Yes |    | negative     | 57    | c.8459G>A                       | p.Trp2820*        | nonsense  | unreported |
| 280                | DMD | 13 | Yes |    | negative     | 57    | c.8479G>T                       | p.Glu2827*        | nonsense  | unreported |
| 281                | DMD | 13 | Yes |    | negative     | 58    | c.8560G>T                       | p.Glu2854*        | nonsense  | unreported |
| 282                | DMD | 4  | Yes |    | not done     | 58    | c.8606C>T                       | p.Arg2876*        | nonsense  | unreported |
| 283                | DMD | 9  | Yes |    | not done     | 58    | c.8608C>T                       | p.Arg2870*        | nonsense  | reported   |
| 284                | DMD | 8  | No  |    | not done     | 58    | c.8608C>T                       | p.Arg2870*        | nonsense  | reported   |
| 285                | DMD | 7  | Yes |    | negative     | 58    | c.8652_8653delCT                | p.Tyr2885Profs*9  | small del | unreported |
| 286                | DMD | 7  | Yes |    | negative     | 59    | c.8692C>T                       | p.Gln2898*        | nonsense  | reported   |
| 287 <sup>*13</sup> | BMD | 31 | No  | 20 | not done     | 59    | c.8713C>T                       | p.Arg2905*        | nonsense  | reported   |
| 288 <sup>*13</sup> | DMD | 34 | No  | 12 | not done     | 59    | c.8713C>T                       | p.Arg2905*        | nonsense  | reported   |
| 289                | DMD | 17 | No  | 8  | negative     | 59    | c.8713C>T                       | p.Arg2905*        | nonsense  | reported   |
| 290                | DMD | 14 | No  | 8  | negative     | 59    | c.8821_8822<br>insAGGCCACTTCAAG | p.Asp2944Glyfs*6  | small ins | unreported |
| 291                | DMD | 19 | No  | 11 | negative     | 59    | c.8833_8854dup                  | p.Gln2952Argfs*10 | small ins | unreported |
| 292                | DMD | 12 | Yes |    | negative     | int59 | c.8669-1 G>C                    |                   | splicing  | reported   |
| 293                | DMD | 14 | Yes |    | negative     | 60    | c.8944C>T                       | p.Arg2982*        | nonsense  | reported   |
| 294                | DMD | 11 | Yes |    | negative     | 60    | c.8944C>T                       | p.Arg2982*        | nonsense  | reported   |
| 295                | DMD | 12 | Yes |    | negative     | 60    | c.9036T>A                       | p.Tyr3012*        | nonsense  | unreported |
| 296                | DMD | 37 | No  | 12 | negative     | int60 | c.9085 -1 G>A                   |                   | splicing  | unreported |
| 297                | DMD | 35 | No  | 11 | negative     | int61 | c.9163+1G>A                     |                   | splicing  | reported   |
| 298                | DMD | 14 | Yes |    | negative     | int61 | c.9164-2A>G                     |                   | splicing  | unreported |
| 299                | DMD | 14 | Yes |    | negative     | 62    | c.9173delA                      | p.Gln3058Argfs*31 | small del | unreported |
| 300                | DMD | 7  | Yes |    | negative     | 62    | c.9183G>A                       | p.Trp3061*        | nonsense  | reported   |
| 301                | DMD | 4  | Yes |    | negative     | 62    | c.9204_9207delCAA               | p.Asn3068Lysfs*20 | small del | reported   |
| 302                | DMD | 13 | No  | 8  | not done     | 62    | c.9216C>G                       | p.Tyr3072*        | nonsense  | unreported |
| 303                | DMD | 12 | Yes |    | negative     | int62 | c.9225-10T>A                    |                   | splicing  | unreported |
| 304                | DMD | 13 | Yes |    | not done     | int62 | c.9225-287C>A                   |                   | splicing  | unreported |
| 305                | DMD | 26 | No  | 11 | not done     | int62 | c.9225-2A>C                     |                   | splicing  | unreported |
| 306                | DMD | 6  | No  |    | not done     | 64    | c.9337C>T                       | p.Arg3113*        | nonsense  | reported   |
| 307                | DMD | 2  | No  |    | not done     | 64    | c.9337C>T                       | p.Arg3113*        | nonsense  | reported   |
| 308                | BMD | 1  | No  |    | not done     | 64    | c.9337C>T                       | p.Arg3113*        | nonsense  | reported   |
| 309                | DMD | 13 | Yes |    | negative     | int64 | c.9361+1G>A                     |                   | splicing  | reported   |
| 310                | DMD | 9  | Yes |    | negative     | 65    | c.9522C>A                       | p.Cys3174*        | nonsense  | reported   |
| 311                | DMD | 5  | Yes |    | negative     | 65    | c.9524G>A                       | p.Trp3180*        | nonsense  | reported   |
| 312                | DMD | 17 | Yes |    | negative     | int65 | c.9563+1G>A                     |                   | splicing  | reported   |
| 313 <sup>*14</sup> | DMD | 9  | Yes |    | faint&patchy | 66    | c.9568C>T                       | p.Arg3190*        | nonsense  | reported   |
| 314 <sup>*14</sup> | DMD | 4  | No  |    | not done     | 66    | c.9568C>T                       | p.Arg3190*        | nonsense  | reported   |
| 315                | DMD | 32 | No  | 19 | negative     | 68    | c.9816dupT                      | p.Lys3273*        | small ins | reported   |
| 316                | DMD | 16 | Yes |    | not done     | 68    | c.9851G>A                       | p.Trp3284*        | nonsense  | reported   |
| 317 <sup>*15</sup> | BMD | 31 | Yes |    | faint&patchy | 68    | c.9896A>G                       | p.His3299Arg      | missense  | unreported |
| 318 <sup>*15</sup> | DMD | 27 | No  | 8  | not done     | 68    | c.9928C>T                       | p.Gln3310*        | nonsense  | reported   |
| 319 <sup>*15</sup> | DMD | 30 | No  | 9  | not done     | 68    | c.9928C>T                       | p.Gln3310*        | nonsense  | reported   |
| 320                | DMD | 19 | No  | 10 | faint&patchy | 68    | c.9937T>C                       | p.Cys3313Arg      | missense  | unreported |
| 321                | DMD | 16 | No  | 6  | negative     | 68    | c.9948C>A                       | p.Cys3316*        | nonsense  | unreported |
| 322                | DMD | 9  | Yes |    | faint&patchy | int68 | c.9975-2A>G                     |                   | splicing  | reported   |

|                    |     |    |     |    |              |       |                           |                   |           |            |
|--------------------|-----|----|-----|----|--------------|-------|---------------------------|-------------------|-----------|------------|
| 323                | DMD | 18 | No  | 11 | unknown      | int68 | c.9974+1G>C               |                   | splicing  | unreported |
| 324                | DMD | 12 | Yes |    | negative     | int68 | c.9975-2A>G               |                   | splicing  | unreported |
| 325                | DMD | 7  | Yes |    | negative     | 69    | c.10011C>G                | p.Cys3337Trp      | missense  | reported   |
| 326                | DMD | 25 | No  | 9  | negative     | 69    | c.10033C>T                | p.Arg3345*        | nonsense  | reported   |
| 327                | DMD | 13 | Yes |    | negative     | 69    | c.10033C>T                | p.Arg3345*        | nonsense  | reported   |
| 328                | DMD | 16 | No  | 10 | negative     | 69    | c.10086delG               | p.Thr3363Leufs*14 | small del | unreported |
| 329                | DMD | 6  | Yes |    | negative     | int69 | c.10087-2A>C              |                   | splicing  | unreported |
| 330                | DMD | 7  | Yes |    | not done     | 70    | c.10096 G>T               | p.Gly3366*        | nonsense  | unreported |
| 331                | DMD | 35 | No  | 9  | not done     | 70    | c.10096_10098delGGA       | p.Gly3366del      | small del | unreported |
| 332                | DMD | 7  | Yes |    | negative     | 70    | c.10108C>T                | p.Arg3370*        | nonsense  | reported   |
| 333                | DMD | 14 | No  | 6  | negative     | 70    | c.10108C>T                | p.Arg3370*        | nonsense  | reported   |
| 334                | DMD | 12 | Yes |    | negative     | 70    | c.10137delA               | p.Lys3379Asnfs*23 | small del | unreported |
| 335                | DMD | 8  | Yes |    | negative     | 70    | c.10141C>T                | p.Arg3381*        | nonsense  | reported   |
| 336                | DMD | 20 | No  | 10 | negative     | 70    | c.10141C>T                | p.Arg3381*        | nonsense  | reported   |
| 337                | DMD | 9  | Yes |    | negative     | 70    | c.10141C>T                | p.Arg3381*        | nonsense  | reported   |
| 338                | DMD | 8  | Yes |    | not done     | 70    | c.10141C>T                | p.Arg 3381*       | nonsense  | reported   |
| 339                | DMD | 9  | Yes |    | not done     | 70    | c.10141C>T                | p.Arg3381*        | nonsense  | reported   |
| 340                | DMD | 42 | No  | 10 | not done     | 70    | c.10141C>T                | p.Arg3381*        | nonsense  | reported   |
| 341 <sup>*16</sup> | DMD | 14 | Yes |    | not done     | 70    | c.10171C>T                | p.Arg3391*        | nonsense  | reported   |
| 342 <sup>*16</sup> | DMD | 20 | No  | 8  | unknown      | 70    | c.10171C>T                | p.Arg3391*        | nonsense  | reported   |
| 343                | DMD | 13 | Yes |    | negative     | 70    | c.10171C>T                | p.Arg3391*        | nonsense  | reported   |
| 344                | DMD | 21 | No  | 8  | not done     | 70    | c.10174delA               | p.Met3392Trpfs*10 | small del | unreported |
| 345                | DMD | 9  | Yes |    | not done     | 70    | c.10174delA               | p.Met3392Trpfs*10 | small del | unreported |
| 346                | DMD | 8  | Yes |    | negative     | 70    | c.10216_10223 delATGGAAAC | p.Met3406Serfs*24 | small del | unreported |
| 347                | DMD | 15 | Yes |    | negative     | int70 | c.10223+1G>A              |                   | splicing  | reported   |
| 348                | DMD | 19 | No  | 8  | negative     | int70 | c.10223+3G>C              |                   | splicing  | reported   |
| 349                | DMD | 12 | Yes |    | negative     | int70 | c.10223+6T>A              |                   | splicing  | unreported |
| 350                | DMD | 21 | No  | 11 | not done     | int70 | c.10224-1insT             |                   | splicing  | unreported |
| 351                | BMD | 57 | Yes |    | faint&patchy | 71    | c.10231dupA               | p.Thr3411Asnfs*22 | small ins | reported   |
| 352                | BMD | 11 | Yes |    | faint&patchy | 71    | c.10231dupA               | p.Thr3411Asnfs*22 | small ins | reported   |
| 353                | BMD | 43 | Yes |    | faint&patchy | 72    | c.10279C>T                | p.Gln3427*        | nonsense  | reported   |
| 354 <sup>*17</sup> | IMD | 43 | No  | 15 | not done     | 72    | c.10320T>A                | p.Tyr3440*        | nonsense  | unreported |
| 355 <sup>*17</sup> | DMD | 42 | No  | 18 | negative     | 72    | c.10320T>A                | p.Tyr3440*        | nonsense  | unreported |
| 356                | BMD | 35 | Yes |    | faint&patchy | int73 | c.10395-1 G>C             |                   | splicing  | unreported |
| 357                | BMD | 7  | Yes |    | faint&patchy | 74    | c.10402G>T                | p.Glu3468*        | nonsense  | unreported |
| 358                | DMD | 11 | Yes |    | faint&patchy | 74    | c.10406dupA               | p.His3469Glnfs*22 | small ins | reported   |
| 359                | DMD | 9  | Yes |    | not done     | 74    | c.10453dupC               | p.Leu3485Profs*6  | small ins | reported   |
| 360                | DMD | 6  | Yes |    | negative     | 74    | c.10453dupC               | p.Leu3485Profs*6  | small ins | reported   |
| 361                | BMD | 37 | No  | 17 | negative     | 74    | c.10453_10454delCT        | p.Leu3485Glufs*5  | small del | unreported |
| 362                | BMD | 37 | No  | 25 | unknown      | 74    | c.10453_10454delCT        | p.Leu3485Glufs*5  | small del | unreported |
| 363                | DMD | 6  | Yes |    | negative     | 74    | c.10454delT               | p.Leu3485Argfs*11 | small del | reported   |
| 364                | DMD | 27 | No  | 11 | not done     | 74    | c.10454delT               | p.Leu3485Argfs*11 | small del | reported   |
| 365                | DMD | 5  | Yes |    | negative     | 74    | c.10495G>T                | p.Glu3499*        | nonsense  | unreported |
| 366 <sup>*18</sup> | BMD | 18 | Yes |    | faint&patchy | 74    | c.10498_10499delAG        | p.Ser3500*        | small del | reported   |
| 367 <sup>*18</sup> | BMD | 9  | Yes |    | not done     | 74    | c.10498_10499delAG        | p.Ser3500*        | small del | reported   |
| 368                | DMD | 14 | Yes |    | negative     | 74    | c.10500_10501delTG        | p.Ser3500Argfs*14 | small del | unreported |



|     |     |    |     |    |          |       |               |             |          |            |
|-----|-----|----|-----|----|----------|-------|---------------|-------------|----------|------------|
| 369 | DMD | 23 | No  | 13 | negative | 75    | c.10651C>T    | p.Gln3551*  | nonsense | reported   |
| 370 | BMD | 22 | Yes |    | not done | 75    | c.10792G>T    | p.Glu 3598* | nonsense | unreported |
| 371 | BMD | 4  | Yes |    | not done | int78 | c.10554-18C>G |             | splicing | reported   |

The patients with \*same number are brothers.

Table S2. Patients with nonsense mutation and faint&amp;patchy dystrophin staining

| no  | phenotype | dystrophin immunostain | exon | DNA change | protein (predicted) |
|-----|-----------|------------------------|------|------------|---------------------|
| 38  | BMD       | faint&patchy           | 9    | c.883C>T   | p.Arg295*           |
| 124 | IMD       | faint&patchy           | 25   | c.3295C>T  | p.Gln1099*          |
| 125 | BMD       | faint&patchy           | 25   | c.3304C>T  | p.Gln1102*          |
| 126 | BMD       | faint&patchy           | 25   | c.3337C>T  | p.Gln1113*          |
| 128 | BMD       | faint&patchy           | 25   | c.3430C>T  | p.Gln1144*          |
| 139 | DMD       | faint&patchy           | 27   | c.3613G>T  | p.Glu1205*          |
| 155 | BMD       | faint&patchy           | 31   | c.4294C>T  | p.Gln1432*          |
| 156 | BMD       | faint&patchy           | 31   | c.4327C>T  | p.Gln1443*          |
| 185 | BMD       | faint&patchy           | 38   | c.5287C>T  | p.Arg1763*          |
| 188 | BMD       | faint&patchy           | 38   | c.5371C>T  | p.Gln1791*          |
| 189 | BMD       | faint&patchy           | 38   | c.5407C>T  | p.Gln 1803*         |
| 210 | DMD       | faint&patchy           | 41   | c.5899C>T  | p.Arg1967*          |
| 212 | IMD       | faint&patchy           | 41   | c.5899C>T  | p.Arg1967*          |
| 264 | BMD       | faint&patchy           | 54   | c.8009G>A  | p.Trp 2670*         |
| 313 | DMD       | faint&patchy           | 66   | c.9568C>T  | p.Arg3190*          |
| 353 | BMD       | faint&patchy           | 72   | c.10279C>T | p.Gln3427*          |
| 357 | BMD       | faint&patchy           | 74   | c.10402G>T | p.Glu3468*          |
